# Supplementary material
Source: Springer Nature journal article supplement (https://www.springermedizin.de/resource/supplementary/13045_2011_155_MOESM3_ESM.pdf/9660760)

Normal bladder tissue

Bladder tumor

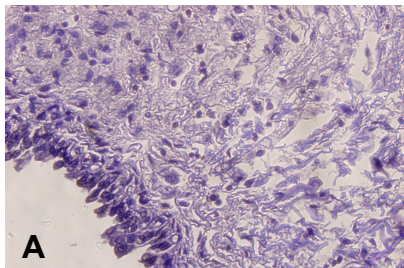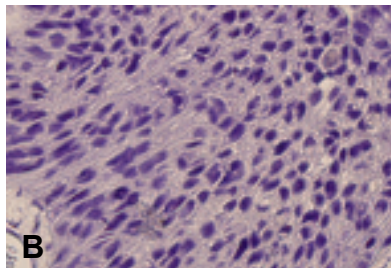

XPC -

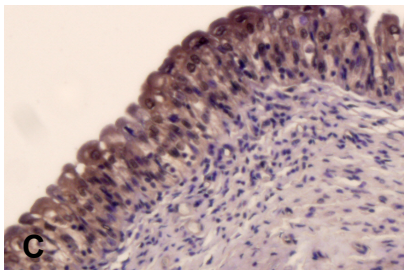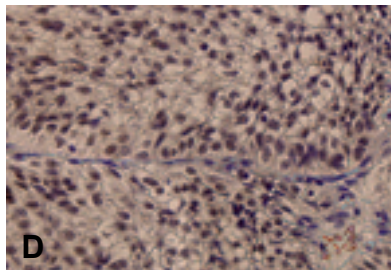

XPC +

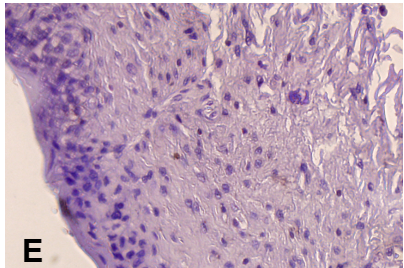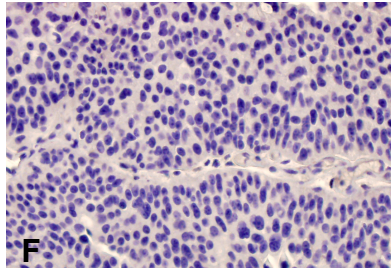

HDAC4 -

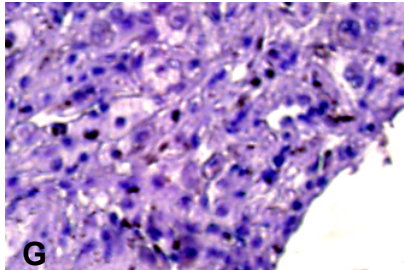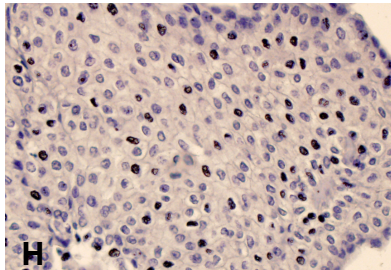

HDAC4 +

Supplement: MOESM3 [file 9660760]
